# Supplementary material for: Short communication: Mechanism and prevention of irreversible trapping of atmospheric He during mineral crushing
Source: Copernicus journal article supplement (doi:10.5194/gchron-4-551-2022), 2022-08-19
Supplement: Supplementary file 1 [file gchron-4-551-2022-supplement.zip]

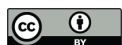

## *Supplement of*

# **Short communication: Mechanism and prevention of irreversible trapping of atmospheric He during mineral crushing**

**Stephen E. Cox et al.**

*Correspondence to:* Stephen E. Cox ([stephen@stephencoxgeology.com](mailto:stephen@stephencoxgeology.com))

- [gchron-4-551-2022-supplement-title-page.pdf](#)
- [He\\_crack\\_model.ipynb](#)
- [gchron-2021-42-supplement-tables.pdf](#)

The copyright of individual parts of the supplement might differ from the article licence.
