# Supplementary material for: Short communication: Mechanism and prevention of irreversible trapping of atmospheric He during mineral crushing
Source: Copernicus journal article supplement (doi:10.5194/gchron-4-551-2022), 2022-08-19
Supplement: Supplementary file 2 [file gchron-4-551-2022-supplement.zip]

| Sample                    | Mass (g) | Low T <sup>4</sup> He mol/g | +/-   | High T <sup>4</sup> He mol/g | +/-   |
|---------------------------|----------|-----------------------------|-------|------------------------------|-------|
| He Soaked                 | 0.029    | 4.02E-10                    | 3E-12 | 1.32E-10                     | 2E-12 |
| He Soaked                 | 0.030    | 3.00E-10                    | 2E-12 | 1.18E-10                     | 1E-12 |
| He Soaked (sieved <50 μm) | 0.016    | 1.310E-09                   | 7E-12 | 2.80E-10                     | 3E-12 |
| N2 then He Soaked         | 0.027    | 8E-13                       | 1E-13 | 2.2E-13                      | 7E-14 |
| N2 Soaked                 | 0.031    | 3.5E-12                     | 2E-13 | 1.9E-13                      | 6E-14 |

Table S1: He measurements for the two-step extraction experiments shown in Figure 1, measured by isotope dilution on a quadrupole mass spectrometer. The He measurements are corrected for the chamber background. The uncertainties are calculated from the standard error of the 4/3 ratio measured on the <sup>3</sup>He-spiked samples (2-σ). The concentrations are calculated by comparison to a calibrated <sup>4</sup>He reference standard measured with the same <sup>3</sup>He spike.

| Sample                        | Mass (g) | <sup>4</sup> He mV | +/- | <sup>3</sup> He (cps) | +/-  | <sup>4</sup> He mol/g | +/-   | <sup>3</sup> He mol/g | +/-   |
|-------------------------------|----------|--------------------|-----|-----------------------|------|-----------------------|-------|-----------------------|-------|
| He Soaked                     | 1.27     | 112.3              | 0.2 | 0.49                  | 0.08 | 1.305E-09             | 6E-12 | 1.3E-16               | 4E-17 |
| He Soaked                     | 0.84     | 43.4               | 0.5 | 0.20                  | 0.04 | 7.66E-10              | 2E-11 | 8E-17                 | 3E-17 |
| HeNeArKr Soaked               | 4.19     | 50.5               | 0.3 | 0.21                  | 0.04 | 1.78E-10              | 2E-12 | 1.7E-17               | 7E-18 |
| HeNeArKr Soaked               | 4.1      | 49.4               | 0.2 | 0.30                  | 0.05 | 1.78E-10              | 2E-12 | 2.4E-17               | 8E-18 |
| He Soaked then Leached        | 1.78     | 10.9               | 0.5 | 0.01                  | 0.03 | 9.05E-11              | 8E-12 | 2E-18                 | 1E-17 |
| Vacuum Crushed then He Soaked | 3.98     | 14.2               | 0.5 | 0.03                  | 0.04 | 5.28E-11              | 4E-12 | 3E-18                 | 6E-18 |
| N2 then He Soaked             | 4.09     | 3.8                | 0.2 | 0.05                  | 0.02 | 1.3E-11               | 2E-12 | 4E-18                 | 3E-18 |
| Outside Air                   | 8.13     | 7.0                | 0.2 | 0.11                  | 0.04 | 1.3E-11               | 9E-13 | 5E-18                 | 3E-18 |
| Water with He headspace       | 6.38     | 5.2                | 0.2 | 0.01                  | 0.05 | 1.2E-11               | 1E-12 | 5E-19                 | 5E-18 |
| Water with Air headspace      | 10.67    | 1.1                | 0.3 | 0.07                  | 0.04 | 1.4E-12               | 8E-13 | 2E-18                 | 2E-18 |
| Lab Air                       | 19.71    | 0.9                | 0.3 | 0.32                  | 0.04 | 7E-13                 | 4E-13 | 5E-18                 | 1E-18 |
| Uncrushed Olivine             | 10.19    | 3.3                | 0.5 | 0.16                  | 0.04 | 4.8E-12               | 1E-12 | 5E-18                 | 3E-18 |

Table S2: He measurements for the single extraction experiments shown in Figure 2, measured by sample-standard bracketing on an MAP 215-50. All samples are sieved to a size range of 37–50  $\mu\text{m}$ . The He measurements have been corrected using procedural blanks. The uncertainties on the  $^4\text{He}$  and  $^3\text{He}$  signal measurements are calculated from the standard error of the gas evolution fit ( $1-\sigma$ ) and the estimated uncertainty of the fit to the procedural blank from the furnace extraction. The He concentrations are calculated using measurements of a He-doped calibrated air standard (“Caltech Air”), and the concentration uncertainties are doubled to provide a 95% confidence interval.
